# Supplementary material for: Identification of flavour additives in tobacco products to develop a flavour library
Source: PubMed Central journal article supplement — Tob Control. 2017 Feb 11;27(1):105–11. doi: 10.1136/tobaccocontrol-2016-052961 (PMC5801651; doi:10.1136/tobaccocontrol-2016-052961), 2017-02-11
Supplement: tobaccocontrol-2016-052961supp001.pdf [file tobaccocontrol-2016-052961supp001.pdf]

## APPENDIX I

In this appendix, the components measured in 33 tobacco products have been shown with their CAS number and the retention time at which the peak appeared on the chromatogram. For each product, the box is marked green when the component is present. The number in the green box represents the signal-to-noise ratio. The final columns respectively represent the components' flavour description and, if known, its odour threshold. The components numbered from 1 up to 144 (coloured blue) represent flavour additives; the components numbered from 145 up to 149 (coloured red) represent the five excluded non-flavour components; and the final components numbered from 150 up to 186 (coloured orange) are the components present in at least one of the reference products (natural tobacco leaves and/or research cigarettes containing no additives) and are therefore not considered flavour additives.



|    |                                                                                                       |                                                                |                                  |            |                   |                                                                           |             |
|----|-------------------------------------------------------------------------------------------------------|----------------------------------------------------------------|----------------------------------|------------|-------------------|---------------------------------------------------------------------------|-------------|
| 20 | eugenol phenol, 2-methoxy-4-(2-propenyl)-, acetate                                                    | 9 6<br>3<br>1<br>09 2<br>7- ,<br>53- 1<br>0 2                  | 1 1 1<br>5 3 4<br>7 2 8<br>5 7 4 |            |                   | Strong, spicy, dry, pungent, smoky, clove-like                            | 6           |
| 21 | α-terpineol                                                                                           | 09 4<br>3- ,<br>28- 2<br>7 1<br>09 9<br>8- ,<br>55- 7<br>5 3   | 7 5 5<br>2 8 3<br>2 7 4          |            | 7 7<br>1 1<br>7 8 | Sweet, spicy, balsamic-clove, fruity; warm clove-like taste               |             |
| 22 | β-copaene                                                                                             | EP 1<br>A- 2<br>36 ,<br>03 4<br>30 2<br>16 1<br>72 4           | 3 2 3<br>5 4 5<br>6 6 6          |            |                   | Woody, earthy                                                             |             |
| 24 | δ-cadinene <delta->                                                                                   | 9- ,<br>01- 2<br>4 9<br>1 1<br>12 3                            | 2 2 2<br>7 2 9<br>0 5 8          |            |                   | Natural substances and extractives                                        |             |
| 25 | ethyl vanillin                                                                                        | 1- ,<br>32- 3<br>4 8<br>1 1<br>10 1                            | 1 1 1<br>5 5 3                   | 2 6<br>9 9 | 1 1<br>1 9        | Intense, sweet, vanilla like odor; creamy vanilla taste                   | 1<br>0<br>0 |
| 26 | γ-triacetin                                                                                           | 2- ,<br>76- 7<br>1 8<br>1 1<br>70 3                            | 1 1 1<br>2 7 3<br>6 6 7          |            |                   | Very weak ethereal-fruity odor; a mild sweet taste; normal use as solvent |             |
| 27 | δ-decalactone <gamma->                                                                                | 6- ,<br>14- 5<br>9 1<br>65 8<br>9- ,<br>70- 3                  |                                  | 8 8<br>6 2 | 2 8<br>6 8        | Coconut-peach like odor; in dilution, peach taste                         | 1<br>0<br>0 |
| 28 | α-solustero                                                                                           | 1 2<br>59 7<br>89- ,<br>27- 2<br>5 6                           | 8 8<br>8 8                       |            | 1 1<br>5 9<br>0 1 | Fruity odor of green-apple, pineapple, tropical, mango, apricot. cognac   | 2<br>0      |
| 29 | β-limonene                                                                                            | 1 1<br>50 0<br>1- ,<br>92- 5<br>8 0                            | 9 9 8<br>4 3 3                   |            |                   | Tarry-medicinal phenolic spicy smoky odor                                 |             |
| 31 | γ-chavicol formic acid, phenylmethyl ester                                                            | 10 7<br>4- ,<br>57- 9<br>4 8<br>20 1                           |                                  | 1 2<br>0 0 | 8 6<br>0 1        | Strong, fresh fruity; cherry, raspberry, blueberry nuance flavor          |             |
| 32 | α-cadin-1(6),4-diene <trans->                                                                         | 08 3<br>5- ,<br>11- 6<br>4 9<br>1 1<br>77 1                    | 8 7 8<br>8 7 2                   |            |                   | Natural substances and extractives                                        |             |
| 33 | β-guaiacol <4-vinyl-> 1h-pyrrole-2-carboxaldehyde, 1-methyl-                                          | 86- ,<br>61- 4<br>0 7<br>11 6<br>92- ,<br>58- 8<br>1 9<br>49 9 | 7 6<br>0 1                       |            | 7 7               | Sweet, spicy, clove-like, somewhat smoky odor; sweet taste                | 3           |
| 34 | α-isomenthone                                                                                         | 1 1<br>17 2<br>54- ,<br>62- 4<br>7 3                           |                                  |            |                   | Somewhat burnt, roasted, cracker, nut                                     | 3<br>7      |
| 35 | β-isomenthone                                                                                         | 1 1<br>17 2<br>54- ,<br>62- 4<br>7 3                           |                                  |            |                   | Strong herbaceous-minty odor; herbaceous, minty, bitter taste             | 9<br>2      |
| 36 | γ-phenyl-, methyl ester, (e)-bicyclo[7.2.0]undec-4-ene, 4,11,11-trimethyl-8-methylene-, [1r*,4z,9s*]- | 1 1<br>11 2<br>8- ,<br>65- 8<br>0 7                            |                                  | 1 0<br>2 2 | 4 4<br>4 0        | Strawberry, fruity                                                        |             |
| 37 | α-1r*,4z,9s*-methylene-, [1r*,4z,9s*]-                                                                | 1 1<br>11 2<br>8- ,<br>65- 8<br>0 7                            | 2 2<br>0 9<br>5 2                |            |                   | Woody, spicy, dry odor                                                    |             |
| 38 | vanillin                                                                                              | 12 1<br>1- 2                                                   | 1 1<br>9 0                       | 1 1<br>9 0 |                   | Powerful, creamy, vanilla-like odor & sweet                               | 5<br>8      |



|   |                                                                                |      |     |     |  |  |     |  |                                                                                                      |
|---|--------------------------------------------------------------------------------|------|-----|-----|--|--|-----|--|------------------------------------------------------------------------------------------------------|
|   |                                                                                | 6    |     |     |  |  |     |  |                                                                                                      |
| 5 |                                                                                | 47   | 7   |     |  |  |     |  |                                                                                                      |
| 8 | eucalyptol                                                                     | 82-6 | 3-2 | 279 |  |  |     |  | Strong, camphoraceous, cool, fresh odor                                                              |
| 5 |                                                                                | 13   | 9   |     |  |  |     |  |                                                                                                      |
| 9 | 4-(1-methyl-2-methylphenyl)-(1r,2r,5s)-5-methyl-2-(prop-1-en-2-yl)cyclohexanol | 87-4 | 0-2 |     |  |  | 276 |  | Sweet, herbaceous, sour, woody-lilac notes                                                           |
| 6 |                                                                                | 29   | 9   |     |  |  |     |  |                                                                                                      |
| 0 |                                                                                | 14   | 9   |     |  |  |     |  |                                                                                                      |
|   |                                                                                | 10-4 | 0-6 | 265 |  |  |     |  | Natural substances and extractives                                                                   |
| 6 |                                                                                | 61   | 9   |     |  |  |     |  |                                                                                                      |
| 1 | 5-(1-methylphenyl)-(-)-8-menthen-2-yl acetate, trans                           | 01-2 | 7-1 |     |  |  | 265 |  | Sweet, woody-cuminic, floral odor; minty, sweet weedy spicy taste                                    |
| 6 |                                                                                | 57   | 1   |     |  |  |     |  |                                                                                                      |
| 2 |                                                                                | 28   | 1   |     |  |  |     |  |                                                                                                      |
|   |                                                                                | 13-5 | 6-3 |     |  |  | 242 |  | unknown = (R)-dihydrocarvyl acetate                                                                  |
| 6 |                                                                                | 10   | 4   |     |  |  |     |  |                                                                                                      |
| 3 | undecalactone <gamma->                                                         | 67-6 | 8-2 |     |  |  | 236 |  | Strong fatty, peach-apricot odor; peach taste in dilution                                            |
| 6 |                                                                                | 53   | 4   |     |  |  |     |  |                                                                                                      |
| 4 | 1,2-propanediol diformate                                                      | 81-8 | 4-2 |     |  |  | 220 |  | unknown                                                                                              |
| 6 |                                                                                | 15   | 1   |     |  |  |     |  |                                                                                                      |
| 5 | 5-methyl-2-(1-methylhydridene)-                                                | 93-2 | 0-4 | 218 |  |  |     |  | Has an minty type odor                                                                               |
| 6 |                                                                                | 06   | 9   |     |  |  |     |  |                                                                                                      |
| 6 | benzoic acid                                                                   | 85-0 | 2-7 | 212 |  |  |     |  | Very weak, balsamic odor and burning taste                                                           |
| 6 |                                                                                | 14   | 6   |     |  |  |     |  |                                                                                                      |
| 7 | hexyl acetate                                                                  | 92-7 | 9-0 |     |  |  | 189 |  | Sweet, fruity, pear-apple like odor; green, banana, apple-pear like taste                            |
| 6 |                                                                                |      |     |     |  |  |     |  |                                                                                                      |
| 8 | 1,2,3,4-tetrahydro-1,6-dimethyl-4-(1-methylphenyl)-, (1s-cis)-                 | 48-3 | 4-3 |     |  |  | 184 |  | Has an herbal type odor.                                                                             |
| 6 |                                                                                | 17   | 1   |     |  |  |     |  |                                                                                                      |
| 9 | menthyl lactate                                                                | 16-2 | 3-7 | 173 |  |  |     |  | Cooling, menthol, fresh, minty                                                                       |
| 7 |                                                                                | 29   | 7   |     |  |  |     |  |                                                                                                      |
| 0 | propanoic acid, 2-methyl-, 3-hydroxy-2,4-trimethylpentyl ester                 | 7-0  | 2-3 |     |  |  |     |  |                                                                                                      |
| 7 |                                                                                | 07   | 2   |     |  |  |     |  |                                                                                                      |
| 1 | terpineol <beta-, trans->                                                      | 68-9 | 3-0 |     |  |  | 168 |  | unknown                                                                                              |
| 7 |                                                                                | 70   | 3   |     |  |  |     |  |                                                                                                      |
| 2 | decalactone <delta->                                                           | 86-2 | 8-9 |     |  |  | 156 |  | Sweet, creamy, milky, peach, nut; peach, buttery in dilution                                         |
| 7 |                                                                                | 09   | 4   |     |  |  |     |  |                                                                                                      |
| 3 | benzopyran-2-one, 6-methyl-6-octen-1-ol, 3,7-dimethyl-, propanoate             | 48-8 | 8-0 |     |  |  | 153 |  | Coumarinic-coconut, tonka-like odor; sweet vanilla-tonka taste                                       |
| 7 |                                                                                | 14   | 3   |     |  |  |     |  |                                                                                                      |
| 4 |                                                                                | 14   | 0   |     |  |  |     |  |                                                                                                      |
| 7 | isovalera                                                                      | 35   | 1   | 1   |  |  |     |  | Sweet fruity rose odor; bittersweet, floral-green-citrus-plum-like taste<br>Fruity, green apple odor |

|   |                                                                                                                                         |                                                                                              |        |             |  |                                                                             |                  |
|---|-----------------------------------------------------------------------------------------------------------------------------------------|----------------------------------------------------------------------------------------------|--------|-------------|--|-----------------------------------------------------------------------------|------------------|
| 5 | te <cis-3-hexenyl->                                                                                                                     | 15 0<br>4 .<br>45- 2<br>1 6<br>10 3                                                          | 4<br>5 |             |  | and taste                                                                   |                  |
| 7 | butyric acid                                                                                                                            | 7- ,<br>92- 8<br>6 2                                                                         |        | 1<br>4<br>0 |  | Strong, cheese, butter-like, sour-rancid odor and taste                     | 2<br>4<br>0<br>1 |
| 7 | isophorone                                                                                                                              | 07 8<br>8- ,<br>59- 6<br>1 8                                                                 |        | 1<br>3<br>8 |  | Sharp, sweet-green-camphoraceous odor; minty-honey-tobacco on dilution      | 1<br>0<br>0<br>0 |
| 7 | 2h-pyran-2-one,                                                                                                                         | 69 1                                                                                         |        |             |  |                                                                             |                  |
| 8 | tetrahydro-6-propyl-2(3h)-furanone, 5-butylidihydro-4-methylacetic acid, phenyl-, isopentyl ester                                       | 8- ,<br>76- 0<br>0 8<br>39 1<br>21 1<br>2- ,<br>23- 6<br>2 1<br>10 3<br>2- ,<br>19- 7<br>2 9 |        |             |  | Coumarinic, coconut odor, creamy, coconut flesh taste                       | 4<br>0<br>0      |
| 7 | 3-hexen-1-ol, formate, (z)-                                                                                                             | 33<br>46 4<br>7- ,<br>73- 6<br>1 9<br>30 1                                                   |        |             |  | Coumarinic, coconut, lactonic, woody, maple and lovage                      | 4<br>6           |
| 8 | muurole ne <gamma->                                                                                                                     | 02 3<br>1- ,<br>74- 7<br>0 3                                                                 |        | 1<br>3<br>0 |  | Sweet, balsamic-floral-fruity-apple; honey notes; reminiscent of cocoa bean |                  |
| 8 | octalactone <gamma->                                                                                                                    | 10 0<br>4 .<br>50- 6<br>7 7                                                                  |        | 1<br>3<br>0 |  | Strong, sharp, green fruity-apple; green fruity vegetable taste             |                  |
| 8 | 2(3h)-furanone, dihydro-5-propyl-                                                                                                       | 10 9<br>5- ,<br>21- 1<br>5 3<br>1                                                            |        |             |  | Has an woody type odor = gamma muurole ne                                   |                  |
| 8 | ionone <(e)-, beta->                                                                                                                    | 07 3<br>9- ,<br>77- 7<br>6 9<br>40 1                                                         |        |             |  | Sweet-coumarinic, coconut-like odor and taste                               | 4<br>0<br>0      |
| 8 | nerolidol <(e)->                                                                                                                        | 71 4<br>6- ,<br>66- 6<br>3 6<br>54 7                                                         |        |             |  | Coconut, hay-like, coumarinic odor                                          | 4<br>0<br>0      |
| 8 | methyl isobutyrate                                                                                                                      | 7- ,<br>63- 5<br>7 9                                                                         |        | 1<br>1<br>4 |  | Woody, violet, fruity odor; woody-raspberry on dilution                     | 0<br>6           |
| 8 | 2-cyclohexen-1-one, 3-methyl-6-(1-methylethyl)-2(3h)-furanone, dihydro-5-methyl-1,3-dioxolane-2-acetic acid, 2,4-dimethyl-, ethyl ester | 10 6<br>8- ,<br>29- 1<br>2 1<br>1<br>62 0<br>90- ,<br>17- 2<br>1 7<br>1                      |        |             |  | Faint, woody-floral, slight green odor; weak green floral taste             | 1<br>2<br>0      |
| 8 | nonanoic acid, ethyl ester                                                                                                              | 12 1<br>3- ,<br>29- 0<br>5 8<br>54                                                           |        | 1<br>1<br>4 |  | Fruity, apple-pineapple-apricot-rum like odor and juicy fruit taste         | 7                |
| 8 | ethanol, 1-(2-butoxyethoxy)-benzaldehyde propylene glycol acetal                                                                        | 44 9<br>6- ,<br>78- 5<br>5 9<br>1<br>25 0<br>68- ,<br>25- 8<br>4 4                           |        |             |  | Fresh strong herbaceous, minty                                              | 6<br>8<br>0      |
| 9 |                                                                                                                                         |                                                                                              |        |             |  | Sweet, hay-like, coumarinic odor and coconut taste                          | 1<br>0<br>0<br>0 |
| 9 |                                                                                                                                         |                                                                                              |        |             |  | Fresh, sweet-fruity notes reminiscent of apple and strawberry               |                  |
| 9 |                                                                                                                                         |                                                                                              |        |             |  | Fatty-waxy, oily, cognac, grape, nut-like odor; wine-cognac tropical taste  | 8<br>5<br>0      |
| 9 |                                                                                                                                         |                                                                                              |        |             |  | Natural substances and extractives                                          |                  |
| 9 |                                                                                                                                         |                                                                                              |        |             |  | Practically odorless; faint cherry, bitter almond                           |                  |











|     |                                                                                             |                                   |                                                 |                                                                                             |                                                     |                                     |                                                                                        |                                                 |        |
|-----|---------------------------------------------------------------------------------------------|-----------------------------------|-------------------------------------------------|---------------------------------------------------------------------------------------------|-----------------------------------------------------|-------------------------------------|----------------------------------------------------------------------------------------|-------------------------------------------------|--------|
| 176 | 2,3-pentanedione                                                                            | 0 2<br>60 3<br>14-0<br>6 6        | 1 1 1 1 1<br>3 2 1 1 2 9 8 8<br>6 2 5 2 5 2 3 5 | 1 1 1 1 1 1 1 1 1 1 1 1 1 1 1<br>0 1 1 3 3 3 4 1 1 1 0 0 1 1<br>6 2 6 9 9 9 2 0 3 5 2 9 1 6 | 1 1<br>9 0 1<br>9 1 4                               | 1 1<br>1 2<br>9 7                   | Oily-buttery, fatty odor; butter, cream, milk taste                                    | 2<br>0                                          |        |
| 177 | 4h-pyran-4-one, 2,3-dihydro-3,5-dihydroxy-6-methyl-                                         | 28<br>56 8<br>4-<br>83-9<br>2 9   | 1 1 1 1<br>1 7<br>2 6                           | 1<br>0 9<br>6 4                                                                             | 1 1<br>8 8 6 8<br>7 8 1 3                           | 1 1<br>1 0<br>7 7                   | unknown                                                                                |                                                 |        |
| 178 | ethanone, 1-(2-furanyl)-                                                                    | 92-<br>62-4<br>7 7                | 1 1 1<br>3 3 1<br>7 3 7                         | 1 1 1<br>1 1 1<br>2 1 8                                                                     | 1 1 1 1 1 1 1<br>1 4 4 4 5 2 2 3<br>9 6 8 7 4 2 8 3 | 1<br>0<br>9                         | Has a balsamic type odor and an nutty type flavor                                      | 2<br>0<br>0                                     |        |
| 179 | butyrolactone                                                                               | 09 5<br>6-<br>48-5<br>0 3         | 9 8<br>2 8                                      | 8<br>3                                                                                      | 7 7<br>7 9                                          | 8<br>4                              | 8 8 8<br>2 3 2                                                                         | Weak, slightly caramellic, nutty, buttery odor  | 0<br>0 |
| 180 | furan-3-one <2-methyl-, tetrahydro->                                                        | 31 4<br>88-<br>00-1<br>9 1        | 9 8 7 7 7 6<br>0 0 8 5 4 7                      | 6<br>0                                                                                      | 7 9 9 9 9 7 7 8 6<br>6 3 2 4 9 8 4 2 3 5 1 0        | 7 7 8<br>5 6 7 9 8 8<br>7 6 7 9 4 1 | Sweet and solvent-like odour, nutty and astringent flavour with a creamy almond nuance |                                                 |        |
| 181 | 5,9-undecadien-2-one, 6,10-dimethyl-, (e)-naphthalene, 1,2,3,4-tetrahydro-1,1,6-trimethyl-  | 1<br>37 3<br>96-<br>70-2<br>1 5   | 1<br>9 0 9 7 8 6 8 0 7<br>8 7 0 8 1 7 1 3 1     | 1<br>9 8<br>3 5                                                                             | 1 1 1 1 1 1 1<br>0 0 0 0 0 0 0 7<br>8 7 8 1 0 5 3 6 | 7 7 9 8<br>4 6 6 6 0                | A fresh, rose, magnolia-type odor                                                      |                                                 |        |
| 182 | 1,4-benzene diol, 2-methyl-2-buten-1-one, 1-(2,6,6-trimethyl-1,3-cyclohexadien-1-yl)-, (e)- | 1<br>47 0<br>5-<br>03-6<br>6 9    | 8 7 7 6<br>7 7 1 6                              | 6<br>7                                                                                      | 6 6 6 7 7 7 8 5<br>9 9 8 0 5 2 0 8                  | 6 6<br>1 5                          | 6 6 8 5 7<br>0 7 2 8 3                                                                 | unknown                                         |        |
| 183 | 1,4-benzene diol, 2-methyl-2-buten-1-one, 1-(2,6,6-trimethyl-1,3-cyclohexadien-1-yl)-, (e)- | 09 7<br>5-<br>71-9<br>6 2         |                                                 |                                                                                             |                                                     |                                     | 6<br>6                                                                                 | unknown                                         |        |
| 184 | pyrrole <2-acetyl->                                                                         | 23 1<br>72 2<br>6-<br>93-4<br>4 6 | 6<br>5                                          | 6<br>5                                                                                      | 7 5 7 6 5<br>5 9 6 1 7                              | 5<br>7                              | 6<br>1                                                                                 | Has a floral type odor and an woody type flavor |        |
| 185 | propanone, 1-(acetyloxy)-                                                                   | 10 7<br>72-<br>83-6<br>9 7        | 8 9 6 8 8 6<br>2 1 8 3 8 4                      | 8<br>4                                                                                      | 8 8 8 8 8 8 9 6 6<br>6 4 6 6 6 0 9 5 3              | 7<br>0                              | 6 7 7 9 5<br>3 0 5 1 7                                                                 | Has a musty type odor and an nutty type flavor  |        |
| 186 | propanone, 1-(acetyloxy)-                                                                   | 59 4<br>2-<br>20-8<br>1 3         | 5<br>6<br>3                                     |                                                                                             | 6 6 6 5 5 6<br>4 6 4 8 9 2                          | 5<br>9                              | 6 6<br>0 8                                                                             | unknown                                         |        |
